# Supplementary material for: Inhibition of 11β-HSD1 Ameliorates Cognition and Molecular Detrimental Changes after Chronic Mild Stress in SAMP8 Mice
Source: MDPI journal article supplement (doi:10.3390/ph14101040), 2021-10-13
Supplement: s1 [file s1]

**Figure S1**

**Protein sequence**

ORIGIN

```
1 mafmkkyllp ilglfmayyy ysaneefrpe mlqgkkvi tv gaskgigrem ayhlakmgah
61 vvv tarsket lqkvvshcle lgaasahyia gtmedmtfae qfvaqagklm ggldmlilnh
121 itntslnlfh ddihhvrksm evnflsyvvl tvaalpmlkq sngsivvvss lagkvaypmv
181 aaysaskfal dgffssirke ysvsrvnvsi tlcvlglidt etamkavsgi vhmqaapkee
241 caleiikgga lrqeevyyds slwttllirn pcrkilefly stsynmdr fi nk
```

**HSD11B1 DNA sequence**

ORIGIN

```
1 acaattcaga ggctgctgcc tgcttaggag gttgtagaaa gctctgtagg ttctctctgt
61 gtgtcctaca ggagtcttca ggccagctcc ctgtcggatg gcttttatga aaaaatatct
121 cctccccatt ctggggctct tcatggccta ctactactat tctgcaaacg aggaattcag
181 accagagatg ctccaaggaa agaaagtgat tgtcacaggg gccagcaaa ggcgcggaag
241 agagatggct tatcatctgg cgaagatggg agcccatgtg gtggtgacag cgaggtcaaa
301 agaaactcta cagaagggtg tatcccactg cctggagcct ggagcagcct cagcacacta
361 cattgctggc accatggaag acatgacctt cgcagagcaa tttgttgccc aagcaggaaa
421 gctcatggga ggactagaca tgctcattct caaccacatc accaactctt ctttgaatct
481 ttttcatgat gatattcacc atgtgcgcaa aagcatggaa gtcaacttcc tcagttacgt
541 ggtcctgact gtagctgcct tgcccattgt gaagcagagc aatggaagca ttgttgctgt
601 ctctctctct gctgggaaa gctggttatcc aatggttgct gcctattctg caagcaagtt
661 tgctttggat ggggttcttct cctccatcag aaaggaatat tcagtgtcca ggggtcaatgt
721 atcaatcact ctctgtgttc ttggcctcat agacacagaa acagccatga aggcagtttc
781 tgggatagtc catatgcaag cagctccaaa ggaggaatgt gccctggaga tcatcaaagg
841 gggagctctg cgccaagaag aagtgtatta tgacagctca ctctggacca ctcttctgat
901 cagaaatcca tgcaggaaga tcctggaatt tctctactca acgagctata atatggacag
961 attcataaac aagtaggaac tccctgaggg ctgggcatgc tgagggattt tgggactgtt
1021 ctgtctcatg tttatctgag ctcttatcta tgaagacatc ttcccagagt gtcccagag
1081 acatgcaagt catgggtcac acctgacaaa tggaaggagt tcctctaaca tttgcaaaat
1141 ggaaatgtaa taataatgaa tgtcatgcac cgctgcagcc agcagttgta aaattgttag
1201 taaacatagg tataattacc agatagttat attaaattta tatcttatat ataataatat
1261 gtgatgatta atacaatatt aattataata aaggtcacat aaactttata aattcataac
1321 tggtagctat aacttgagct tattcaggat ggtttcttta aaaccataaa ctgtacaaat
1381 gaaa
```

**Fusion Protein design**

NheI Kozak

```
5' GCTAGCGCCACCATGGCGAGC ATGGATAGCACTGAGAACGTCATCAAGCCCTTCATGCGCTTCAAGGT
GCACATGGAGGGCTCCGTGAACGGCCACGAGTTCGAGATCGAGGGCGTGGGCGAGGGCAAGCCCTACGAG
GGCACCCAGACCGCCAAGCTGCAAGTGACCAAGGGCGGCCCTGCCCTTCGCCTGGGACATCCTGTCCC
CCCAGTTCTTCTACGGCTCCAAGGCGTACATCAAGCACCCCGCCGACATCCCCGACTACCTCAAGCAGTC
CTTCCCCGAGGGCTTCAAGTGGGAGCGCGTGATGAACTTCGAGGACGGCGGCGTGGTGACCGTGACCCAG
GACTCCTCCCTGCAGGACGGCACCCCTCATCTACCACGTGAAGTTCATCGGCGTGAAGTTCCTCCCTCCGACG
GCCCCGTAATGCAGAAGAAGACTCTGGGCTGGGAGCCCTCCACTGAGCGCAACTACCCCCGCGACGGCGT
GCTGAAGGGCGGAGAACCACATGGCGCTGAAGCTGAAGGGCGGCGGCCACTACCTGTGTGAGTTCAAGTCC
ATCTACATGGCCAAGAAGCCCGTGAAGCTGCCCGGCTACCACTACGTGGACTACAAGCTCGACATCACCT
CCCACAACGAGGACTACACCGTGGTGGAGCAGTACGAGCGCGCCGAGGCCCCGCCACCACCTGTTCCAGGA
TGACGATGACAAGATGGCTTTTATGAAAAAATATCTCCTCCCCATTCTGGGGCTCTTCATGGCCTACTAC
TACTATTCTGCAAACGAGGAATTCAGACCAGAGATGCTCCAAGGAAAGAAAGTGATTGTACAGGGGCCA
GCAAAGGGATCGGAAGAGAGATGGCTTATCATCTGGCGAAGATGGGAGCCCATGTGGTGGTGACAGCGAG
GTCAAAAGAAACTCTACAGAAGGTGGTATCCCAGTGCCTGGAGCTTGGAGCAGCCTCAGCAGACTACATT
GCTGGCACCATTGGAAGACATGACCTTCGCAGAGCAATTTGTTGCCCAAGCAGGAAAGCTCATGGGAGGAC
TAGACATGCTCATTTCTCAACCACATCACCAACACTTCTTTGAATCTTTTTTCATGATGATATTCACCATGT
GCGCAAAAGCATGGAAGTCAACTTCCTCAGTTACGTGGTCTGACTGTAGCTGCCTTGCCCATGCTGAAG
```

CAGAGCAATGGAAGCATTGTTGTCGTCTCCTCTCTGGCTGGGAAAGTGGCTTATCCAATGGTTGCTGCCT  
ATTCTGCAAGCAAGTTTGCTTTGGATGGGTCTTCTCCTCCATCAGAAAGGAATATTCAGTGTCCAGGGT  
CAATGTATCAATCACTCTCTGTGTTCTTGGCCTCATAGACACAGAAACAGCCATGAAGGCAGTTTCTGGG  
ATAGTCCATATGCAAGCAGCTCCAAAGGAGGAATGTGCCCTGGAGATCATCAAAGGGGGAGCTCTGCGCC  
AAGAAGAAGTGTATTATGACAGCTCACTCTGGACCACTCTTCTGATCAGAAATCCATGCAGGAAGATCCT  
GGAATTCTCTACTCAACGAGCTATAATATGGACAGATTCATAACAAG**TAG**CGGGCCGC**3'**

Not1

**Table S1.** Antibodies used in Western blot studies.

| <b>Antibody</b>                            | <b>Host</b> | <b>Source/Catalog</b>  | <b>WB dilution</b> |
|--------------------------------------------|-------------|------------------------|--------------------|
| <b>Acetyl H4K12</b>                        | Sheep       | R&D Systems/AF5215     | 1:1000             |
| <b>H4</b>                                  | Rabbit      | Cell Signaling/#2592   | 1:1000             |
| <b>Acetyl H3K9</b>                         | Rabbit      | Millipore/06-599       | 1:1000             |
| <b>H3</b>                                  | Rabbit      | Cell Signaling/#9715   | 1:1000             |
| <b>H3K9me2</b>                             | Rabbit      | Cell Signaling/#4658   | 1:1000             |
| <b>NF-<math>\kappa</math>B</b>             | Rabbit      | Cell Signaling/DE14E12 | 1:1000             |
| <b>NRF2</b>                                | Rabbit      | Santa Cruz/sc-722      | 1:500              |
| <b>Beclin 1</b>                            | Rabbit      | Abcam/ab62557          | 1:1000             |
| <b>p-TORC1 S151</b>                        | Rabbit      | Cell Signaling/#3359   | 1:1000             |
| <b>TORC1</b>                               | Rabbit      | Cell Signaling/#2501   | 1:1000             |
| <b>LC3B</b>                                | Rabbit      | Cell Signaling/#2775   | 1:1000             |
| <b>p-CREB S133</b>                         | Rabbit      | Cell Signaling/#9198   | 1:1000             |
| <b>CREB</b>                                | Rabbit      | Cell Signaling/#4820   | 1:1000             |
| <b>BDNF</b>                                | Rabbit      | Santa Cruz/N-20        | 1:500              |
| <b>PSD95</b>                               | Rabbit      | Abcam/ab12093          | 1:2000             |
| <b>Synaptophysin</b>                       | Mouse       | Millipore/MAB5258      | 1:1000             |
| <b>SNAP25</b>                              | Mouse       | Santa Cruz/ SP-12      | 1:500              |
| <b>GAPDH</b>                               | Mouse       | Millipore/MAB374       | 1:2000             |
| <b><math>\beta</math>-Tubulin</b>          | Mouse       | Millipore/Clone AA2    | 1:2000             |
| <b>TBP</b>                                 | Mouse       | Abcam/ab818            | 1:2000             |
| <b>Goat-anti-mouse<br/>HRP conjugated</b>  |             | Biorad/170-5047        | 1:2000             |
| <b>Goat-anti-rabbit<br/>HRP conjugated</b> |             | Biorad/170-6515        | 1:2000             |
| <b>Donkey-anti-goat<br/>HRP conjugated</b> |             | Santa Cruz/sc-2020     | 1:2000             |

**Table S2.** Primers and probes used in qPCR studies.

SYBR-Green primers

| Target                               | Product size (bp) | Forward primer (5'-3')              | Reverse primer (5'-3') |
|--------------------------------------|-------------------|-------------------------------------|------------------------|
| <i>Tet2</i>                          | 113               | CCATCATGTTGTGGGACGGA                | ATTCTGAGAACAGCGACGGT   |
| <i>Hdac2</i>                         | 280               | CTATCCCGCTCTGTGCCCT                 | GAGGCTTCATGGGATGACCC   |
| <i>Il-18</i>                         | 179               | ACAGAATATCAACCAACAAGTTG<br>ATATTCTC | GATTCTTTCCTTTGAGGCCCA  |
| <i>Cxcl2</i>                         | 100               | AGCCACACTTCAGCCTAGCG                | TGTAGCCTGGTGGTTGGTGG   |
| <i>Tnf-<math>\alpha</math></i>       | 157               | TCGGGGTGATCGGTCCCCAA                | TGGTTTGCTACGACGTGGGCT  |
| <i>Gfap</i>                          | 125               | CCTTCTGACACGGATTTGGT                | ACATCGAGATCGCCACCTAC   |
| <i>Aox1</i>                          | 286               | CATAGGCGGCCAGGAACATT                | TCCTCGTTCAGAAATGCAGC   |
| <i>iNOS</i>                          | 101               | GGCAGCCTGTGAGACCTTTG                | GAAGCGTTTCGGGATCTGAA   |
| <i>Adam10</i>                        | 125               | CCTTCTGACACGGATTTGGT                | CTGTACAGCAGGGTCCTTGAC  |
| <i>Bace1</i>                         | 67                | ACAAGCCTTTCGCCTCC                   | TCAGGCCACCATAATCCAGC   |
| <i>A<math>\beta</math>-precursor</i> | 99                | TCGGGGTGATCGGTCCCCAA                | GTCACGTTCCACCTCCCCAG   |
| <i>Neprilisin12</i>                  | 196               | TTGGGAGACCTGGCGGAAAC                | CATTCTTGACCCTCACCCC    |
| <i>Creb</i>                          | 86                | GGCTGCTGCTGCCTGT                    | ACACACCGCGTCAAACCTACA  |
| <i><math>\beta</math>-actin</i>      | 218               | CTGTCCCTGTATGCCTCTG                 | ATGTCACGCACGATTTCC     |

Taqman probes

| Target       | Product size (bp) | Reference     |
|--------------|-------------------|---------------|
| <i>Dnmt1</i> | 58                | Mm01151063_m1 |
| <i>Gapdh</i> | 107               | Mm99999915_g1 |
